# Supplementary material for: Crystal formation of 1D coordination polymers based on chiral, achiral and racemic 1,2-cyclohexane scaffolds
Source: Royal Society of Chemistry journal article supplement (doi:10.1039/c9ce01781j), 2020-01-01
Supplement: c9ce01781j1.pdf [file c9ce01781j1.pdf]

ESI

## Crystals formation of 1D coordination polymers based on chiral, achiral and racemic 1,2-cyclohexane scaffold

Abdelaziz Jouaiti,<sup>a\*</sup> Philippe Grosshans,<sup>a</sup> Nathalie Kyritsakas,<sup>a</sup> Sylvie Ferlay,<sup>a\*</sup> Marc Henry,<sup>b</sup> Mir Wais Hosseini<sup>a</sup>

### Characterization

Compound **c**, Bis-pyridin, 4,4'-[*cis*-1,2-cyclohexanediylbis(oxy)]

<sup>1</sup>H-RMN (300 MHz, CDCl<sub>3</sub>, 25 °C)

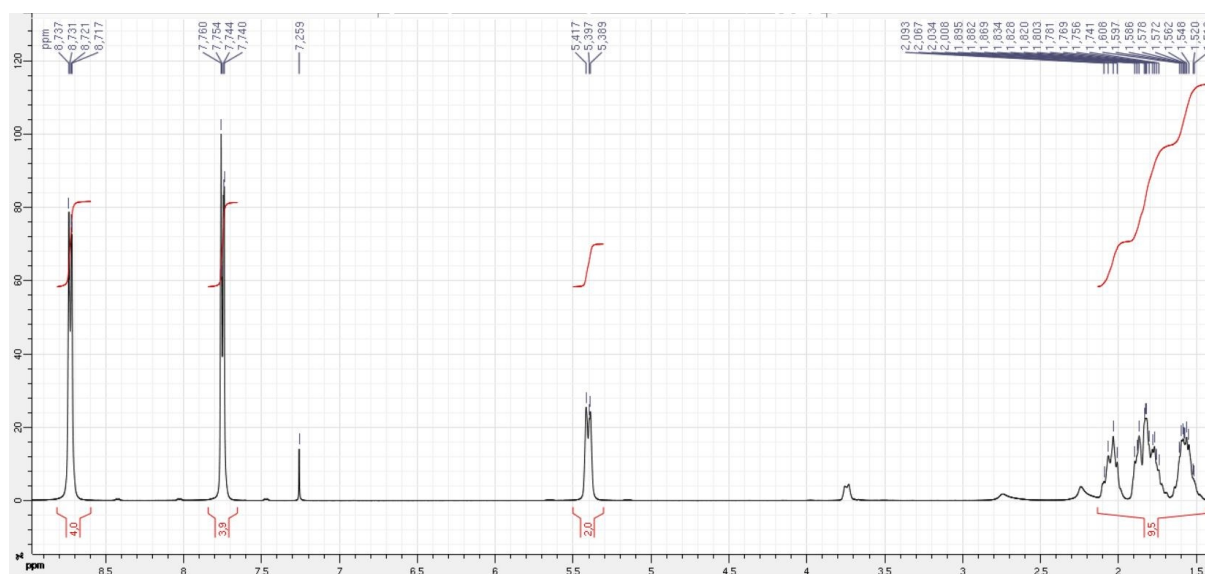

<sup>13</sup>C-RMN (125 MHz, CDCl<sub>3</sub>, 25 °C)

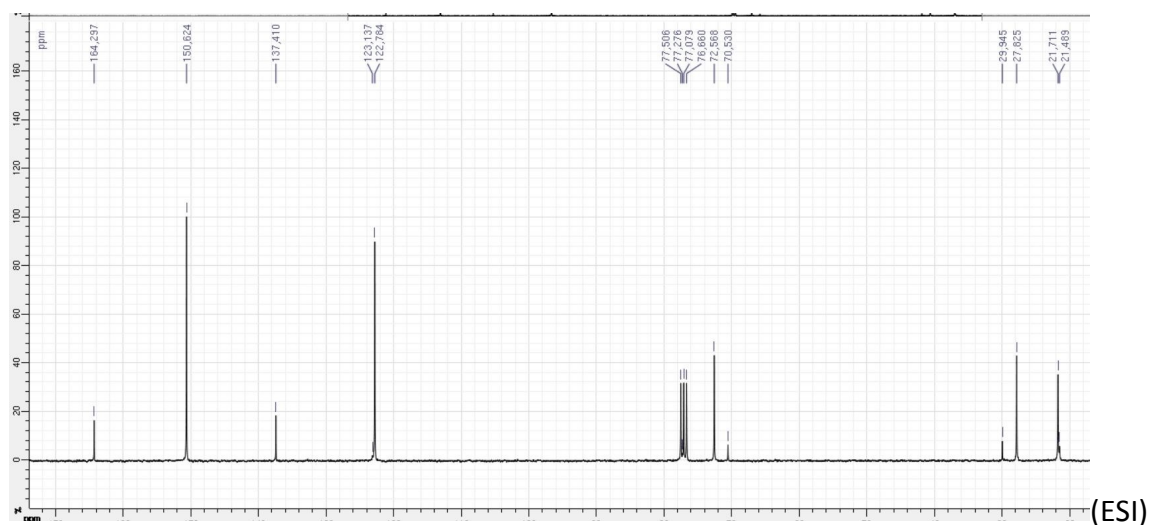

## Analysis Info

|               |                     |                  |                      |
|---------------|---------------------|------------------|----------------------|
| Analysis Name | F04730SK.d          | Acquisition Date | 9/3/2019 10:35:42 AM |
| Method        | Tune_pos_Standard.m | Operator         | BDAL@DE              |
| Sample Name   | AJ Cis              | Instrument       | micrOTOF II          |

## Acquisition Parameter

|              |          |            |        |           |           |                    |          |
|--------------|----------|------------|--------|-----------|-----------|--------------------|----------|
| Source Type  | ESI      | Capillary  | 4500 V | Nebulizer | 0.3 Bar   | Set Hexapole RF    | 55.0 Vpp |
| Ion Polarity | Positive | Dry Heater | 200 °C | Dry Gas   | 3.0 l/min | Set Capillary Exit | 100.0 V  |

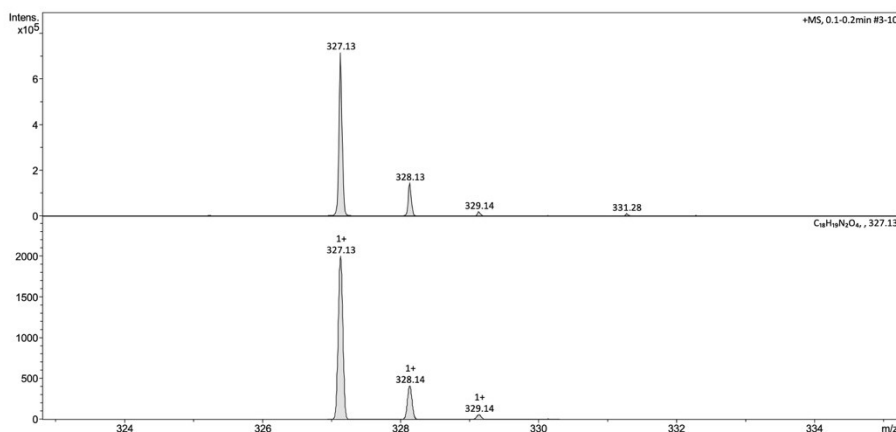

## PACHA: General considerations

The PACHA formalism is a very useful method for probing intermolecular interaction energies in a perfectly non-empirical way that do not follow the usual decomposition of the total energy into coulombic, polarization, dispersion, repulsive, H-bonding terms. The crucial physical reason for not relying on such a partition of the total energy in PACHA is that all these terms depend on the same electromagnetic interaction involving electrons and protons.

However, for such an approach to be reliable, three requirements should imperatively be met:

i) The partial charges distributions should be self-consistent and should not involve empirical scalings. With PACHA this requirement is met using an electronegativity equalization principle coupled to the universal Allen's scale and to atomic radii computed using relativistic wavefunctions solutions of the Dirac equations.

ii) The SE (Self-Energy)-term should be at least one order of magnitude large than the F-term meaning that the method is not well-suited for completely apolar compounds. In practice this requirement is met as soon as it exists one oxygen or nitrogen atom in the investigated compound. This means that crystalline elements and pure hydrocarbons characterized by a null or rather small electronegativity differences between constituting atoms are not well-handled by PACHA and should be treated by other methods.

iii) Compounds displaying an energy difference between the ground state and the first excited electronic state less than 1 eV (semi-conductors, semi-metals, metals, radicals, etc...) should be considered with extreme care as in this case the adiabatic approximation may not apply. For such compounds, a full quantum-mechanical treatment becomes mandatory.

One of the big advantage of the PACHA approach is that hydrogen-bonded systems may be easily and rigorously treated on the same theoretical ground as non hydrogen-bonded systems. This is crucial as in most other methods, hydrogen bonding is usually considered as a very difficult problem needing ad hoc potentials. In PACHA, hydrogen bonding is automatically included as a consequence of the validity of the Hellman-Feynman theorem and is just a particular case of the universal electromagnetic interaction that is easily handled by the SE (Self-Energy) term.

Table 1 gives the atomic parameterization that have been used in this paper. As packing energies are very sensitive to H-atom positions in PACHA, coordinates for H-atoms derived from X-ray structures cannot be used owing to the large errors made on these atomic positions. In order to avoid introducing unphysical values, all C-H bond lengths have been fixed at the standard value of 108 pm allowing performing reliable comparisons between crystal structures derived from single-crystal X-ray diffraction.

| Element                  | H     | C     | N     | O     | Cl    | Hg    |
|--------------------------|-------|-------|-------|-------|-------|-------|
| van der Waals radius /pm | 120   | 170   | 155   | 152   | 175   | 155   |
| Electronegativity /eV    | 13.61 | 15.05 | 18.13 | 21.36 | 16.97 | 10438 |
| Atomic radius /pm        | 53.0  | 62.0  | 52.1  | 45.0  | 72.4  | 112.6 |

**Table 1:** Standard sets of van der Waals radii <sup>1</sup> used for the computation of packing coefficients, with associated atomic electronegativities <sup>2</sup> and radii <sup>3</sup> used for partial charges evaluation in PACHA.

The PACHA algorithm, based on charge partial calculations, has been described in previous publications, (M. Henry, *ChemPhysChem*, **2002**, 3, 561-569. M. Henry, *ChemPhysChem*, **2002**, 3, 607-616.). Moreover, it is the only algorithm able to interpret 183W NMR chemical shifts with the computed partial charges distribution [*N. J. Chem*, **2017**, 41, 6112-6119].

The algorithm has been applied with success in a wide range of compounds containing metals:

Ferey et al. *J. Am. Chem. Soc.* 2003, 125, 1912-1922

Steed et al. *J. Am. Chem. Soc.* 2005, 127, 11063-11074

Souillard et al. *J. Col. Inter. Sc*, 2006, 307, 175-182

Steed et al. *Chem. Eur. J.* 2011, 17, 10259-10271

Steed et al. *Cryst. Gr.&Des.* 2012, 12, 1395-1401

## Calculations

### Calculation of Packing Energy (PE)

<sup>1</sup> A. Bondi, *J. Phys. Chem.*, 1964, **68**, 441-451.

<sup>2</sup> J. B. Mann, T. L. Meek and L. C. Allen, *J. Am. Chem. Soc.*, 2000, **122**, 2780.

<sup>3</sup> J. T. Waber and D. T. Cromer, *J. Chem. Phys.*, 1965, **42**, 4116.

In the crystalline state, the Packing Energy may depend on the different crystallographic directions. In this case, we propose to introduce three structure descriptors, reflecting the anisotropy of the molecular packing. The basic idea is to use three partial space-group symmetries (packing sub-groups) creating large voids in the structure that lead to a strong reduction of the Packing Energy. The three Partial Packing Energy (PPE), reflecting the packing anisotropy, are assumed to be in the order  $PPE_1 < PPE_2 < PPE_3$ , one may define the isotropic *Partial Packing Energy*  $\langle PE \rangle$ :

$$\langle PE \rangle = (PPE_1 + PPE_2 + PPE_3)/3$$

And the *Packing Energy span*  $\Delta PE$ :

$$\Delta PE = PPE_1 - PPE_3$$

And the *Packing Energy skew*  $\eta PE$ :

$$\eta PE = 3(PPE_2 - \langle PE \rangle) / \Delta PE$$

(with  $\eta = 0$  in the case of spherical symmetry when  $\Delta = 0$ ).

$-1 < \eta PE < +1$  (tri-axial ellipsoid) is measuring the deviation from pure axial symmetry characterized by  $\eta PE = +1$  (oblate ellipsoid) and  $\eta PE = -1$  (prolate ellipsoid).

### Calculation of Cooperativity Index (CI)

A last structure descriptor would then be the CI *cooperativity index*:

$$CI = 3\langle PE \rangle - PE$$

reflecting the cooperativity ( $CI < 0$ ) or anti-cooperativity ( $CI > 0$ ) of the stacking of the layers generated by each sub-group.

On purely intuitive grounds, one may expect low packing anisotropies for achiral space-groups and large packing anisotropies for chiral space-groups.

### Calculations for 1a-HgCl<sub>2</sub>, 1b-HgCl<sub>2</sub>, 1c-HgCl<sub>2</sub> and 1a<sub>0.5</sub>1b<sub>0.5</sub>-HgCl<sub>2</sub>

Table 1 shows the results obtained by applying the PACHA approach to **1a-HgCl<sub>2</sub>**, **1b-HgCl<sub>2</sub>**, **1c-HgCl<sub>2</sub>** and **1a<sub>0.5</sub>1b<sub>0.5</sub>-HgCl<sub>2</sub>**. The evaluation of *PE* is performed step by step: the Self-Energies (*SE* in kJ·mol<sup>-1</sup>) for mercury dichloride HgCl<sub>2</sub>, the free ligand and a molecular chain generated by complexation between HgCl<sub>2</sub> and the ligands. Then «*Net*» corresponds to the self-energy of the fully interacting chains in kJ·mol<sup>-1</sup>, from which a Packing Energy may be evaluated as

$$PE = (Net - Chain * 4)$$

For the solvated network (**1a<sub>0.5</sub>1b<sub>0.5</sub>-HgCl<sub>2</sub>**) this Packing Energy corresponds to Packing = [Net - (Chain + CHCl<sub>3</sub>) \* 4] with CHCl<sub>3</sub> = -6 kJ·mol<sup>-1</sup>.

Then, the average Hg-N bond energy (kJ·mol<sup>-1</sup>) has been evaluated according to:

$$Hg-N = (Chain - HgCl_2 - ligand) / 2.$$

| Crystal              | Group                                         | HgCl <sub>2</sub> | Ligand  | Chain   | Net      | PE      | CI    | Hg-N   |
|----------------------|-----------------------------------------------|-------------------|---------|---------|----------|---------|-------|--------|
| 1a-HgCl <sub>2</sub> | P2 <sub>1</sub> 2 <sub>1</sub> 2 <sub>1</sub> | -150(2)           | -299(2) | -536(2) | -2267(9) | -123(9) | -2(2) | -43(2) |

| Crystal                                                  | Group                                           | HgCl <sub>2</sub> | Ligand  | Chain   | Net      | PE      | CI     | Hg-N   |
|----------------------------------------------------------|-------------------------------------------------|-------------------|---------|---------|----------|---------|--------|--------|
| <b>1b-HgCl<sub>2</sub></b>                               | <b>P2<sub>1</sub>2<sub>1</sub>2<sub>1</sub></b> | -150(2)           | -299(2) | -535(2) | -2264(9) | -124(9) | -2(2)  | -43(2) |
| <b>1c-HgCl<sub>2</sub></b>                               | <b>P2<sub>1</sub>2<sub>1</sub>2</b>             | -151/-152(2)      | -309(2) | -534(2) | -2314(9) | -178(9) | -33(2) | -37(2) |
| <b>1a<sub>0.5</sub>1b<sub>0.5</sub>-HgCl<sub>2</sub></b> | <b>P2<sub>1</sub>/n</b>                         | -150(2)           | -295(2) | -532(2) | -2368(9) | -214(9) | -3(2)  | -44(2) |

**Table 2:** Calculation performed for 1a-HgCl<sub>2</sub>, 1b-HgCl<sub>2</sub>, 1c-HgCl<sub>2</sub> and 1a<sub>0.5</sub>1b<sub>0.5</sub>-HgCl<sub>2</sub> using the PACHA approach.

As mentioned above, the three different PPE (Partial Packing Energies) have to be evaluated considering the symmetry associated with different space groups of the coordination networks and their associated sub-space groups.

### 1a-HgCl<sub>2</sub> or 1b-HgCl<sub>2</sub> (Space group P2<sub>1</sub>2<sub>1</sub>2<sub>1</sub>)

These compounds crystallise in the P2<sub>1</sub>2<sub>1</sub>2<sub>1</sub> space-group, the choice of subgroups is obvious (P2<sub>1</sub>.1.1, P1.2<sub>1</sub>.1 and P1.1.2<sub>1</sub>) as this group contains only twofold screw axes that all act as packing operators. The three partial packing energies (PPE) have been calculated as :

$$\begin{aligned} \text{PPE1} &= \text{SE (P1.2}_1\text{.1)/2} - \text{SE} = -23(2) \text{ kJ}\cdot\text{mol}^{-1} \text{ for } \mathbf{1b-HgCl_2} \\ &\quad \text{and} = -22(2) \text{ kJ}\cdot\text{mol}^{-1} \text{ for } \mathbf{1a-HgCl_2} \\ \text{PPE2} &= \text{SE (P1.1.2}_1\text{)/2} - \text{SE} = -7(2) \text{ kJ}\cdot\text{mol}^{-1} \text{ for } \mathbf{1b-HgCl_2} \\ &\quad \text{and} = -7(2) \text{ kJ}\cdot\text{mol}^{-1} \text{ for } \mathbf{1a-HgCl_2} \\ \text{PPE3} &= \text{SE (P2}_1\text{.1.1)/2} - \text{SE} = -2(2) \text{ kJ}\cdot\text{mol}^{-1} \text{ for } \mathbf{1b-HgCl_2} \\ &\quad \text{and} = -2(2) \text{ kJ}\cdot\text{mol}^{-1} \text{ for } \mathbf{1a-HgCl_2} \end{aligned}$$

$$\langle \text{PE} \rangle = -11 \text{ kJ}\cdot\text{mol}^{-1}, \Delta \text{PE} = -21(9) \text{ kJ}\cdot\text{mol}^{-1} \text{ and } \eta \text{PE} = -0,57$$

The Cooperativity Index (CI) reflecting the cooperativity between the chains is:

$$\text{CI} = 3\langle \text{PE} \rangle - \text{PE}/4 = 31 - 33 = -2(2) \text{ kJ}\cdot\text{mol}^{-1} \text{ for } \mathbf{1a-HgCl_2} \text{ or } \mathbf{1b-HgCl_2}$$

### 1c-HgCl<sub>2</sub> (Space group P2<sub>1</sub>2<sub>1</sub>2)

This compound crystallizes in the P2<sub>1</sub>2<sub>1</sub>2 space-group, the twofold axis acts as an intramolecular symmetry operator that has no effect on the packing efficiency. In order to be able to discuss the packing anisotropy in this compound, we have considered a supercell of the P2<sub>1</sub>2<sub>1</sub>2 space-group, obtained by doubling the c-parameter leading to a new space group displaying 8 symmetry operators instead of 4:

$$\#1 = x, y, z \rightarrow 1$$

$$\#2 = x, y, 1/2+z \rightarrow 1(0,0,1/2)$$

$$\#3 = -x, -y, z \rightarrow 2 \ 0,0,z$$

$$\#4 = 1/2-x, 1/2+y, -z \rightarrow 2(0,1/2,0) \ 1/4, y, 0$$

$$\#5 = -x, -y, 1/2+z \rightarrow 2(0,0,1/2) \ 0,0,z$$

$$\#6 = 1/2-x, 1/2+y, 1/2-z \rightarrow 2(0,1/2,0) \ 1/4, y, 1/4$$

$$\#7 = 1/2+x, 1/2-y, -z \rightarrow 2(1/2,0,0) \ x, 1/4, 0$$

$$\#8 = 1/2+x, 1/2-y, 1/2-z \rightarrow 2(1/2,0,0) \ x, 1/4, 1/4$$

It is then possible to generate three packing sub-groups: P112<sub>1</sub>(2) by choosing operators #(1,2,3,5), P2<sub>1</sub>2<sub>1</sub>2 (screw axes at z = 0) using operators #(1,3,4,7) and P'2<sub>1</sub>2<sub>1</sub>2

(screw axes at  $z = 1/4$ ) using operators  $\#(1,3,6,8)$ . The three partial packing energies (PPE) have been then calculated as:

$$\text{PPE1} = \text{SE} [P1.1.2(2_1)]/4 - \text{SE} = -30(2) \text{ kJ}\cdot\text{mol}^{-1}$$

$$\text{PPE2} = \text{SE} (P'2_1.2_1.2)/4 - \text{SE} = -25(2) \text{ kJ}\cdot\text{mol}^{-1}$$

$$\text{PPE3} = \text{SE} (P2_1.2_1.2)/4 - \text{SE} = -24(2) \text{ kJ}\cdot\text{mol}^{-1}$$

$$\langle \text{PE} \rangle = -26 \text{ kJ}\cdot\text{mol}^{-1}, \Delta \text{PE}_{\text{SR}} = -6(2) \text{ kJ}\cdot\text{mol}^{-1} \text{ and } \eta_{\text{PE}} = -0,5.$$

The computed Cooperativity Index CI is then:

$$\text{CI} = 3\langle \text{PE} \rangle - \text{PE}/4 = 45 - 78 = -33(2) \text{ kJ}\cdot\text{mol}^{-1}$$

### **1a<sub>0,5</sub>1b<sub>0,5</sub>-HgCl<sub>2</sub>** (Space group $P2_1/n$ )

In this case, the choice of subgroups is obvious ( $P2_1$ ,  $P-1$  and  $Pn$ ) since all symmetry operators are used for packing molecular chains. The three partial packing energies (PPE) have been calculated as :

$$\text{PPE1} = \text{SE}(P2_1)/4 - \text{SE} = -23(2) \text{ kJ}\cdot\text{mol}^{-1}$$

$$\text{PPE2} = \text{SE}(P-1)/4 - \text{SE} = -10(2) \text{ kJ}\cdot\text{mol}^{-1}$$

$$\text{PPE3} = \text{SE}(Pn)/4 - \text{SE} = -2(2) \text{ kJ}\cdot\text{mol}^{-1}$$

$$\langle \text{PE} \rangle = -12 \text{ kJ}\cdot\text{mol}^{-1}, \Delta \text{PE} = -21(2) \text{ kJ}\cdot\text{mol}^{-1} \text{ and } \eta_{\text{PE}} = -0,29$$

The computed Cooperativity Index CI is then:

$$\text{CI} = 3\langle \text{PE} \rangle - \text{PE}/4 = 33 - 36 = -3(2) \text{ kJ}\cdot\text{mol}^{-1}$$

```

_NAME_e1450
      11.6797(13)      12.746(2)      16.331(2)      90.00000
100.554(10)      90.00000 P121/n1
 1 Hg 0.16215(3) 1.38244(3) 0.71872(2) c101 @80 :4a
 2 C11 0.0679(2) 1.35829(18) 0.83369(14) z-1 c41 @17 :4a
 3 C12 0.1655(2) 1.4184(2) 0.57762(14) z-1 c41 @17 :4a
 4 N1 0.3151(6) 1.2492(6) 0.7427(5) c5 @7 :4a
 5 C1 0.3653(8) 1.2192(7) 0.6797(5) c2 @6 :4a
 6 H1 0.32984 1.24772 0.61799 z1 c89 @1 :4a
 7 C2 0.4601(7) 1.1537(7) 0.6895(5) c2 @6 :4a
 8 H2 0.49764 1.13072 0.63649 z1 c89 @1 :4a
 9 C3 0.5064(7) 1.1177(6) 0.7683(5) c2 @6 :4a
10 C4 0.4547(8) 1.1479(7) 0.8345(5) c2 @6 :4a
11 H4 0.48734 1.11992 0.89683 z1 c89 @1 :4a
12 C5 0.3610(8) 1.2143(7) 0.8185(5) c2 @6 :4a
13 H5 0.32217 1.23974 0.87028 z1 c89 @1 :4a
14 C6 0.6123(8) 1.0487(7) 0.7779(5) c2 @6 :4a
15 O1 0.6742(5) 1.0473(4) 0.7255(3) z-2 c84 @8 :4a
16 O2 0.6280(5) 0.9915(4) 0.8474(3) z-2 c84 @8 :4a
17 C7 0.7298(8) 0.9221(7) 0.8599(5) z0 c2 @6 :4a
18 H7 0.73757 0.88679 0.80105 z1 c89 @1 :4a
19 C8 0.7099(8) 0.8372(7) 0.9195(5) z0 c2 @6 :4a
20 H8 0.68991 0.87091 0.97590 z1 c89 @1 :4a
21 C9 0.8158(8) 0.7649(7) 0.9395(6) z-2 c2 @6 :4a
22 H9A 0.80162 0.70831 0.98584 z1 c89 @1 :4a
23 H9B 0.82585 0.72242 0.88403 z1 c89 @1 :4a
24 C10 0.9266(8) 0.8263(7) 0.9717(5) z-2 c2 @6 :4a
25 H10A 0.92049 0.86253 1.03053 z1 c89 @1 :4a
26 H10B 1.00029 0.77365 0.98173 z1 c89 @1 :4a
27 C11 0.9438(8) 0.9093(7) 0.9096(6) z-2 c2 @6 :4a
28 H11A 0.95569 0.87233 0.85224 z1 c89 @1 :4a
29 H11B 1.02149 0.95371 0.93350 z1 c89 @1 :4a
30 C12 0.8384(7) 0.9838(7) 0.8922(5) z-2 c2 @6 :4a
31 H12A 0.82901 1.02410 0.94877 z1 c89 @1 :4a
32 H12B 0.85192 1.04182 0.84672 z1 c89 @1 :4a
33 O3 0.6105(5) 0.7760(5) 0.8758(3) z-2 c84 @8 :4a
34 C13 0.5614(8) 0.7112(8) 0.9235(5) c2 @6 :4a
35 O4 0.5840(5) 0.7086(5) 0.9991(3) z-2 c84 @8 :4a
36 C14 0.4734(8) 0.6397(7) 0.8743(5) c2 @6 :4a
37 C15 0.4048(7) 0.5801(7) 0.9156(5) c2 @6 :4a
38 H15 0.41264 0.58669 0.98233 z1 c89 @1 :4a
39 C16 0.3262(8) 0.5120(7) 0.8713(5) c2 @6 :4a
40 H16 0.27290 0.46530 0.90482 z1 c89 @1 :4a
41 N2 0.3122(6) 0.5005(5) 0.7899(4) c5 @7 :4a
42 C17 0.3791(8) 0.5593(7) 0.7487(5) c2 @6 :4a
43 H17 0.36784 0.55191 0.68182 z1 c89 @1 :4a
44 C18 0.4627(7) 0.6296(7) 0.7897(6) c2 @6 :4a
45 H18 0.51705 0.67440 0.75570 z1 c89 @1 :4a
46 C19 0.7248(8) 0.8719(7) 0.6126(5) z2 c2 @6 :4a
47 H19 0.67412 0.87017 0.66166 z1 c89 @1 :4a
48 C13 0.6565(3) 0.9535(2) 0.52997(18) z-1 c41 @17 :4a
49 C14 0.8661(2) 0.9169(3) 0.65148(19) z-1 c41 @17 :4a
50 C15 0.7356(3) 0.7460(2) 0.5726(2) z-1 c41 @17 :4a
_DATE_e1450 on Tue Nov 05 17:41:05 2019 Pacha V2.6
_ORGN Original format was Crystallographic Information File
CIFHEADER
_audit_creation_method SHELXL-2014/6
_chemical_formula_moiety

```

```

'C18 H18 Cl2 Hg N2 O4, C H Cl3'
_chemical_formula_sum
'C19 H19 Cl5 Hg N2 O4'
_chemical_formula_weight          717.20
_space_group_crystal_system       monoclinic
_space_group_IT_number            14
_space_group_name_H-M_alt         'P 21/n'
_space_group_name_Hall             '-P 2yn'
_exptl_crystal_description        prism
_exptl_crystal_colour             colorless
_exptl_crystal_density_meas       none
_exptl_crystal_density_diffrn    1.993
_exptl_crystal_F_000              1376
_exptl_crystal_size_max           0.130
_exptl_crystal_size_mid           0.120
_exptl_crystal_size_min           0.120
_exptl_absorpt_coefficient_mu     7.027
_exptl_absorpt_correction_type    multi-scan
_exptl_absorpt_correction_T_min   0.461
_exptl_absorpt_correction_T_max   0.489
_exptl_absorpt_process_details    sadabs
_diffrn_ambient_temperature        173(2)
_diffrn_radiation_wavelength       0.71073
_diffrn_radiation_type             MoK\alpha
_diffrn_source                     'fine-focus sealed tube'
_diffrn_measurement_device_type    'CCD area detector'
_diffrn_measurement_method         'phi and omega scans'
_diffrn_reflns_number              5182
_diffrn_reflns_av_unetI/netI       0.0920
_diffrn_reflns_av_R_equivalents    0.0750
_diffrn_reflns_limit_h_min         0
_diffrn_reflns_limit_h_max         15
_diffrn_reflns_limit_k_min         0
_diffrn_reflns_limit_k_max         16
_diffrn_reflns_limit_l_min         -18
_diffrn_reflns_limit_l_max         18
_diffrn_reflns_theta_min           2.387
_diffrn_reflns_theta_max           27.470
_diffrn_reflns_theta_full          25.242
_diffrn_measured_fraction_theta_max 0.945
_diffrn_measured_fraction_theta_full 0.973
_diffrn_reflns_Laue_measured_fraction_max 0.945
_diffrn_reflns_Laue_measured_fraction_full 0.973
_diffrn_reflns_point_group_measured_fraction_max 0.945
_diffrn_reflns_point_group_measured_fraction_full 0.973
_reflns_number_total               5182
_reflns_number_gt                  2913
_reflns_threshold_expression        'I > 2\sigma(I)'
_reflns_Friedel_coverage            0.000
_reflns_Friedel_fraction_max       .
_reflns_Friedel_fraction_full      .
_reflns_special_details
;
Reflections were merged by SHELXL according to the crystal
class for the calculation of statistics and refinement.

_computing_structure_refinement 'SHELXL-2014/6 (Sheldrick, 2014)'
_computing_molecular_graphics   'Bruker SHELXTL'

```



```

_computing_publication_material 'Bruker SHELXTL'
_refine_ls_structure_factor_coef Fsqd
_refine_ls_matrix_type full
_refine_ls_weighting_scheme calc
_refine_ls_weighting_details
'w=1/[\s^2^(Fo^2^)+(0.0102P)^2^+11.6797P] where P=(Fo^2^+2Fc^2^)/3'
_refine_ls_hydrogen_treatment constr
_refine_ls_extinction_method none
_refine_ls_extinction_coef .
_refine_ls_number_reflns 5182
_refine_ls_number_parameters 256
_refine_ls_number_restraints 0
_refine_ls_R_factor_all 0.1137
_refine_ls_R_factor_gt 0.0477
_refine_ls_wR_factor_ref 0.1085
_refine_ls_wR_factor_gt 0.0862
_refine_ls_goodness_of_fit_ref 0.823
_refine_ls_restrained_S_all 0.823
_refine_ls_shift/su_max 0.003
_refine_ls_shift/su_mean 0.002
_refine_diff_density_max 1.311
_refine_diff_density_min -1.158
_refine_diff_density_rms 0.191
ENDCIF
_CELL Vol= 2390.06 Å3 Z= 4
_SPGR ITC= 14 HM= P 21/n HALL= -P 2yn
_NHKL 2 EWD= 0 KIN= -0.090 INC=0.01 ESIG=1000 DMP=0 GKR=1
_QTOT =0
_OPTM EPS=3 ANG=360 RTE=0.99 ANL=10 MOV=0 MIX=1
_RVDW H=120 C=170 N=155 O=152 Cl=175 Hg=155
_ANAL DMIN=1.080 FIRST=238 OCF=0.93 RESI=200
_BNDS (1-1)=60(40) (1-6)=107(60) (1-7)=100(60) (1-
8)=96(60) (1-17)=132(60)
(1-80)=177(60) (6-6)=154(40) (6-7)=114(60) (6-8)=107(60) (6-
17)=134(60)
(6-80)=175(60) (7-7)=140(40) (7-8)=97(60) (7-17)=124(60) (7-
80)=165(60)
(8-8)=132(40) (8-17)=117(60) (8-80)=158(60) (17-17)=204(40) (17-
80)=185(60)
(80-80)=274(0)
_EBND
β

```

Partial Charge Distribution Evaluation -> e1450

\_CELL Vol= 2390.06  $\sqrt{\text{Å}}$  z= 4

[H19 C19 N2 O4 C15 Hg ]\*4 = 2868.96 amu

Madelung summation details

Ewald parameter for 1/R summation was  $K = 0.129 \sqrt{\text{Å}^{-1}}$  (accuracy =  $4e-010$ )

Reciprocal space exploration:  $-2 \leq (h, k, l) \leq 2$

min = 8.89860 eV < mean = 16.42282 eV < max = 125.45198 eV

Madelung constant  $A = 147.9474020/4 = 36.9868505$  (dmin =  $0.94945 \sqrt{\text{Å}}$ )

Orbital compression factor was OCF = 82.00%

Total electrostatic balance =  $-2243.8149 \text{ eV} = -216495.2 \text{ kJ.mol}^{-1}$

\*\*\*Atomic electronegativities (eV) and radii (pm) \*\*\*

Hg( 10.438, 112.6)

Cl( 16.970, 72.4)

N( 18.130, 52.1)

C( 15.050, 62.0)

H( 13.610, 53.0)

O( 21.360, 45.0)

Level of significance for Madelung elements  $\text{eps} = 5.292126e-009$

Convergence criterion  $|Ax - b|/|b| < \text{eps}$

Estimated error on charges after 24 iterations =  $2.058074e-010$

\*\*\* PACHA signature \*\*\*

Mean electronegativity  $\langle EN \rangle = 15.0369 \text{ eV}$

Partial electrostatic balance:  $\langle EB \rangle = -24.5298 \text{ eV} = -2366.8 \text{ kJ.mol}^{-1}$

Reduced electrostatic balance:  $\langle EB/4 \rangle = -6.1324 \text{ eV} = -591.7 \text{ kJ.mol}^{-1}$

Global ionicity:  $\langle GI \rangle = 10.4557 \%$

| #n  | Label ( $\rightarrow$ tox) [CN] | Charge $\rightarrow$ q         |
|-----|---------------------------------|--------------------------------|
| #33 | O3(-2) [ 2] =                   | -0.27664 $\rightarrow$ 10.12 V |
| #35 | O4(-2) [ 1] =                   | -0.27600 $\rightarrow$ 10.03 V |
| #16 | O2(-2) [ 2] =                   | -0.27297 $\rightarrow$ 9.65 V  |
| #15 | O1(-2) [ 1] =                   | -0.26867 $\rightarrow$ 9.10 V  |
| #2  | C11(-1) [ 1] =                  | -0.23061 $\rightarrow$ 10.61 V |
| #3  | C12(-1) [ 1] =                  | -0.22614 $\rightarrow$ 10.26 V |
| #4  | N1(-2) [ 2] =                   | -0.20969 $\rightarrow$ 10.81 V |
| #41 | N2(-2) [ 2] =                   | -0.20772 $\rightarrow$ 10.59 V |
| #50 | C15(-1) [ 1] =                  | -0.13267 $\rightarrow$ 2.82 V  |
| #48 | C13(-1) [ 1] =                  | -0.12359 $\rightarrow$ 2.10 V  |
| #49 | C14(-1) [ 1] =                  | -0.11652 $\rightarrow$ 1.54 V  |
| #27 | C11(-2) [ 4] =                  | -0.07887 $\rightarrow$ 7.28 V  |
| #21 | C9(-2) [ 4] =                   | -0.07799 $\rightarrow$ 7.19 V  |
| #24 | C10(-2) [ 4] =                  | -0.07759 $\rightarrow$ 7.16 V  |
| #30 | C12(-2) [ 4] =                  | -0.07714 $\rightarrow$ 7.11 V  |
| #44 | C18(-1) [ 3] =                  | -0.04063 $\rightarrow$ 3.72 V  |
| #7  | C2(-1) [ 3] =                   | -0.03912 $\rightarrow$ 3.58 V  |
| #10 | C4(-1) [ 3] =                   | -0.03712 $\rightarrow$ 3.40 V  |
| #37 | C15(-1) [ 3] =                  | -0.03289 $\rightarrow$ 3.00 V  |
| #9  | C3(+0) [ 3] =                   | +0.00235 $\rightarrow$ -0.27 V |
| #36 | C14(+0) [ 3] =                  | +0.00441 $\rightarrow$ -0.46 V |
| #5  | C1(+0) [ 3] =                   | +0.00717 $\rightarrow$ -0.72 V |
| #42 | C17(+0) [ 3] =                  | +0.00908 $\rightarrow$ -0.90 V |
| #12 | C5(+0) [ 3] =                   | +0.01174 $\rightarrow$ -1.14 V |
| #39 | C16(+0) [ 3] =                  | +0.01623 $\rightarrow$ -1.56 V |
| #19 | C8(+0) [ 4] =                   | +0.03405 $\rightarrow$ -3.22 V |

|     |                 |                      |
|-----|-----------------|----------------------|
| #17 | C7(+0) [ 4] =   | +0.03724 -> -3.51 V  |
| #46 | C19(+2) [ 4] =  | +0.04594 -> -4.32 V  |
| #43 | H17(+1) [ 1] =  | +0.04824 -> 0.47 V   |
| #29 | H11B(+1) [ 1] = | +0.05259 -> -0.01 V  |
| #25 | H10A(+1) [ 1] = | +0.06018 -> -0.83 V  |
| #6  | H1(+1) [ 1] =   | +0.06416 -> -1.26 V  |
| #28 | H11A(+1) [ 1] = | +0.07129 -> -2.04 V  |
| #26 | H10B(+1) [ 1] = | +0.07391 -> -2.32 V  |
| #13 | H5(+1) [ 1] =   | +0.07639 -> -2.59 V  |
| #40 | H16(+1) [ 1] =  | +0.07745 -> -2.71 V  |
| #31 | H12A(+1) [ 1] = | +0.08153 -> -3.15 V  |
| #45 | H18(+1) [ 1] =  | +0.08274 -> -3.28 V  |
| #8  | H2(+1) [ 1] =   | +0.08727 -> -3.78 V  |
| #20 | H8(+1) [ 1] =   | +0.09116 -> -4.20 V  |
| #32 | H12B(+1) [ 1] = | +0.09166 -> -4.25 V  |
| #23 | H9B(+1) [ 1] =  | +0.09455 -> -4.57 V  |
| #18 | H7(+1) [ 1] =   | +0.09487 -> -4.60 V  |
| #22 | H9A(+1) [ 1] =  | +0.09519 -> -4.64 V  |
| #11 | H4(+1) [ 1] =   | +0.10145 -> -5.32 V  |
| #47 | H19(+1) [ 1] =  | +0.10193 -> -5.37 V  |
| #38 | H15(+1) [ 1] =  | +0.10367 -> -5.56 V  |
| #34 | C13(+3) [ 3] =  | +0.17673 -> -16.47 V |
| #14 | C6(+3) [ 3] =   | +0.17725 -> -16.52 V |
| #1  | Hg(+2) [ 2] =   | +0.73017 -> -18.95 V |

Total sum for Charge = 0.0

Statistical report:

```

<Atom>[num] = mean  $\pm$  3 $\sqrt{\text{stdev}}$  (stdev) <avdev>
<q(H)> = 0.08159 (0.01663) <0.01354>
<q(C)> = 0.00320 (0.07363) <0.05135>
<q(N)> = -0.20870 (0.00139) <0.00098>
<q(O)> = -0.27357 (0.00364) <0.00275>
<q(Cl)> = -0.16590 (0.05734) <0.04998>
<q(Hg)> = 0.73017 (0.00000) <0.00000>

```

Statistical report:

```

<Atom>[num] = mean  $\pm$  3 $\sqrt{\text{stdev}}$  (stdev) <avdev>
<q(black)> = 0.00320 (0.07363) <0.05135>
<q(royal_blue)> = -0.20870 (0.00139) <0.00098>
<q(green)> = -0.16590 (0.05734) <0.04998>
<q(red)> = -0.27357 (0.00364) <0.00275>
<q(silver)> = 0.08159 (0.01663) <0.01354>
<q(wood)> = 0.73017 (0.00000) <0.00000>

```

|     |                |       |
|-----|----------------|-------|
| #1  | Hg(+2) [ 2] =  | +0.73 |
| #2  | C11(-1) [ 1] = | -0.23 |
| #3  | C12(-1) [ 1] = | -0.23 |
| #4  | N1(-2) [ 2] =  | -0.21 |
| #5  | C1(+0) [ 3] =  | +0.01 |
| #6  | H1(+1) [ 1] =  | +0.06 |
| #7  | C2(-1) [ 3] =  | -0.04 |
| #8  | H2(+1) [ 1] =  | +0.09 |
| #9  | C3(+0) [ 3] =  | +0.00 |
| #10 | C4(-1) [ 3] =  | -0.04 |
| #11 | H4(+1) [ 1] =  | +0.10 |

|     |                 |       |
|-----|-----------------|-------|
| #12 | C5(+0) [ 3] =   | +0.01 |
| #13 | H5(+1) [ 1] =   | +0.08 |
| #14 | C6(+3) [ 3] =   | +0.18 |
| #15 | O1(-2) [ 1] =   | -0.27 |
| #16 | O2(-2) [ 2] =   | -0.27 |
| #17 | C7(+0) [ 4] =   | +0.04 |
| #18 | H7(+1) [ 1] =   | +0.09 |
| #19 | C8(+0) [ 4] =   | +0.03 |
| #20 | H8(+1) [ 1] =   | +0.09 |
| #21 | C9(-2) [ 4] =   | -0.08 |
| #22 | H9A(+1) [ 1] =  | +0.10 |
| #23 | H9B(+1) [ 1] =  | +0.09 |
| #24 | C10(-2) [ 4] =  | -0.08 |
| #25 | H10A(+1) [ 1] = | +0.06 |
| #26 | H10B(+1) [ 1] = | +0.07 |
| #27 | C11(-2) [ 4] =  | -0.08 |
| #28 | H11A(+1) [ 1] = | +0.07 |
| #29 | H11B(+1) [ 1] = | +0.05 |
| #30 | C12(-2) [ 4] =  | -0.08 |
| #31 | H12A(+1) [ 1] = | +0.08 |
| #32 | H12B(+1) [ 1] = | +0.09 |
| #33 | O3(-2) [ 2] =   | -0.28 |
| #34 | C13(+3) [ 3] =  | +0.18 |
| #35 | O4(-2) [ 1] =   | -0.28 |
| #36 | C14(+0) [ 3] =  | +0.00 |
| #37 | C15(-1) [ 3] =  | -0.03 |
| #38 | H15(+1) [ 1] =  | +0.10 |
| #39 | C16(+0) [ 3] =  | +0.02 |
| #40 | H16(+1) [ 1] =  | +0.08 |
| #41 | N2(-2) [ 2] =   | -0.21 |
| #42 | C17(+0) [ 3] =  | +0.01 |
| #43 | H17(+1) [ 1] =  | +0.05 |
| #44 | C18(-1) [ 3] =  | -0.04 |
| #45 | H18(+1) [ 1] =  | +0.08 |
| #46 | C19(+2) [ 4] =  | +0.05 |
| #47 | H19(+1) [ 1] =  | +0.10 |
| #48 | C13(-1) [ 1] =  | -0.12 |
| #49 | C14(-1) [ 1] =  | -0.12 |
| #50 | C15(-1) [ 1] =  | -0.13 |

Total sum for Charge = 0.0

#### Steric Energy Evaluation

After summing over 3x3x3 cells

Distance threshold for bonded atoms was 4.596  $\sqrt{\text{\AA}}$

Total steric energy = 10099.7 kJ.mol<sup>-1</sup>

Bonded steric energy = 9991.6 kJ.mol<sup>-1</sup>

Steric energy = 108.1 kJ.mol<sup>-1</sup>

#### Bond Valence Sum Evaluation

#1 Hg(+2) [2] = 1.57 -> C12 C11

#2 C11(-1) [1] = 0.78 -> Hg

#3 C12(-1) [1] = 0.79 -> Hg

#4 N1(-2) [2] = 2.80 -> C1 C5

#5 C1(+0) [3] = 3.51 -> H1 N1 C2

#6 H1(+1) [1] = 1.06 -> C1

#7 C2(-1) [3] = 3.13 -> H2 C1 C3

#8 H2(+1) [1] = 1.06 -> C2

#9 C3(+0) [3] = 2.78 -> C2 C4 C6  
#10 C4(-1) [3] = 3.12 -> H4 C5 C3  
#11 H4(+1) [1] = 1.06 -> C4  
#12 C5(+0) [3] = 3.51 -> H5 N1 C4  
#13 H5(+1) [1] = 1.06 -> C5  
#14 C6(+3) [3] = 3.63 -> O1 O2 C3  
#15 O1(-2) [1] = 1.70 -> C6  
#16 O2(-2) [2] = 1.97 -> C6 C7  
#17 C7(+0) [4] = 3.32 -> H7 O2 C8 C12  
#18 H7(+1) [1] = 1.06 -> C7  
#19 C8(+0) [4] = 3.26 -> H8 O3 C7 C9  
#20 H8(+1) [1] = 1.06 -> C8  
#21 C9(-2) [4] = 3.50 -> H9B H9A C10 C8  
#22 H9A(+1) [1] = 1.06 -> C9  
#23 H9B(+1) [1] = 1.06 -> C9  
#24 C10(-2) [4] = 3.55 -> H10B H10A C11 C9  
#25 H10A(+1) [1] = 1.06 -> C10  
#26 H10B(+1) [1] = 1.06 -> C10  
#27 C11(-2) [4] = 3.51 -> H11B H11A C10 C12  
#28 H11A(+1) [1] = 1.06 -> C11  
#29 H11B(+1) [1] = 1.06 -> C11  
#30 C12(-2) [4] = 3.51 -> H12B H12A C7 C11  
#31 H12A(+1) [1] = 1.06 -> C12  
#32 H12B(+1) [1] = 1.06 -> C12  
#33 O3(-2) [2] = 1.95 -> C13 C8  
#34 C13(+3) [3] = 3.65 -> O4 O3 C14  
#35 O4(-2) [1] = 1.72 -> C13  
#36 C14(+0) [3] = 2.87 -> C15 C18 C13  
#37 C15(-1) [3] = 3.17 -> H15 C14 C16  
#38 H15(+1) [1] = 1.06 -> C15  
#39 C16(+0) [3] = 3.57 -> H16 N2 C15  
#40 H16(+1) [1] = 1.06 -> C16  
#41 N2(-2) [2] = 2.79 -> C16 C1
